# Supplementary material for: Non-Imidazole Histamine H3 Ligands. Part VII. Synthesis, In Vitro and In Vivo Characterization of 5-Substituted-2-thiazol-4-n-propylpiperazines
Source: MDPI journal article supplement (doi:10.3390/molecules23020326), 2018-02-03

*“Non-imidazole histamine H<sub>3</sub> ligands. Part VII. Synthesis, in vitro and in vivo characterization of 5-substituted-2-thiazol-4-n-propylpiperazines”*

## **Appendix A**

### **Supplementary data**

*<sup>1</sup>H and <sup>13</sup>C spectra for final compounds 3a-f*

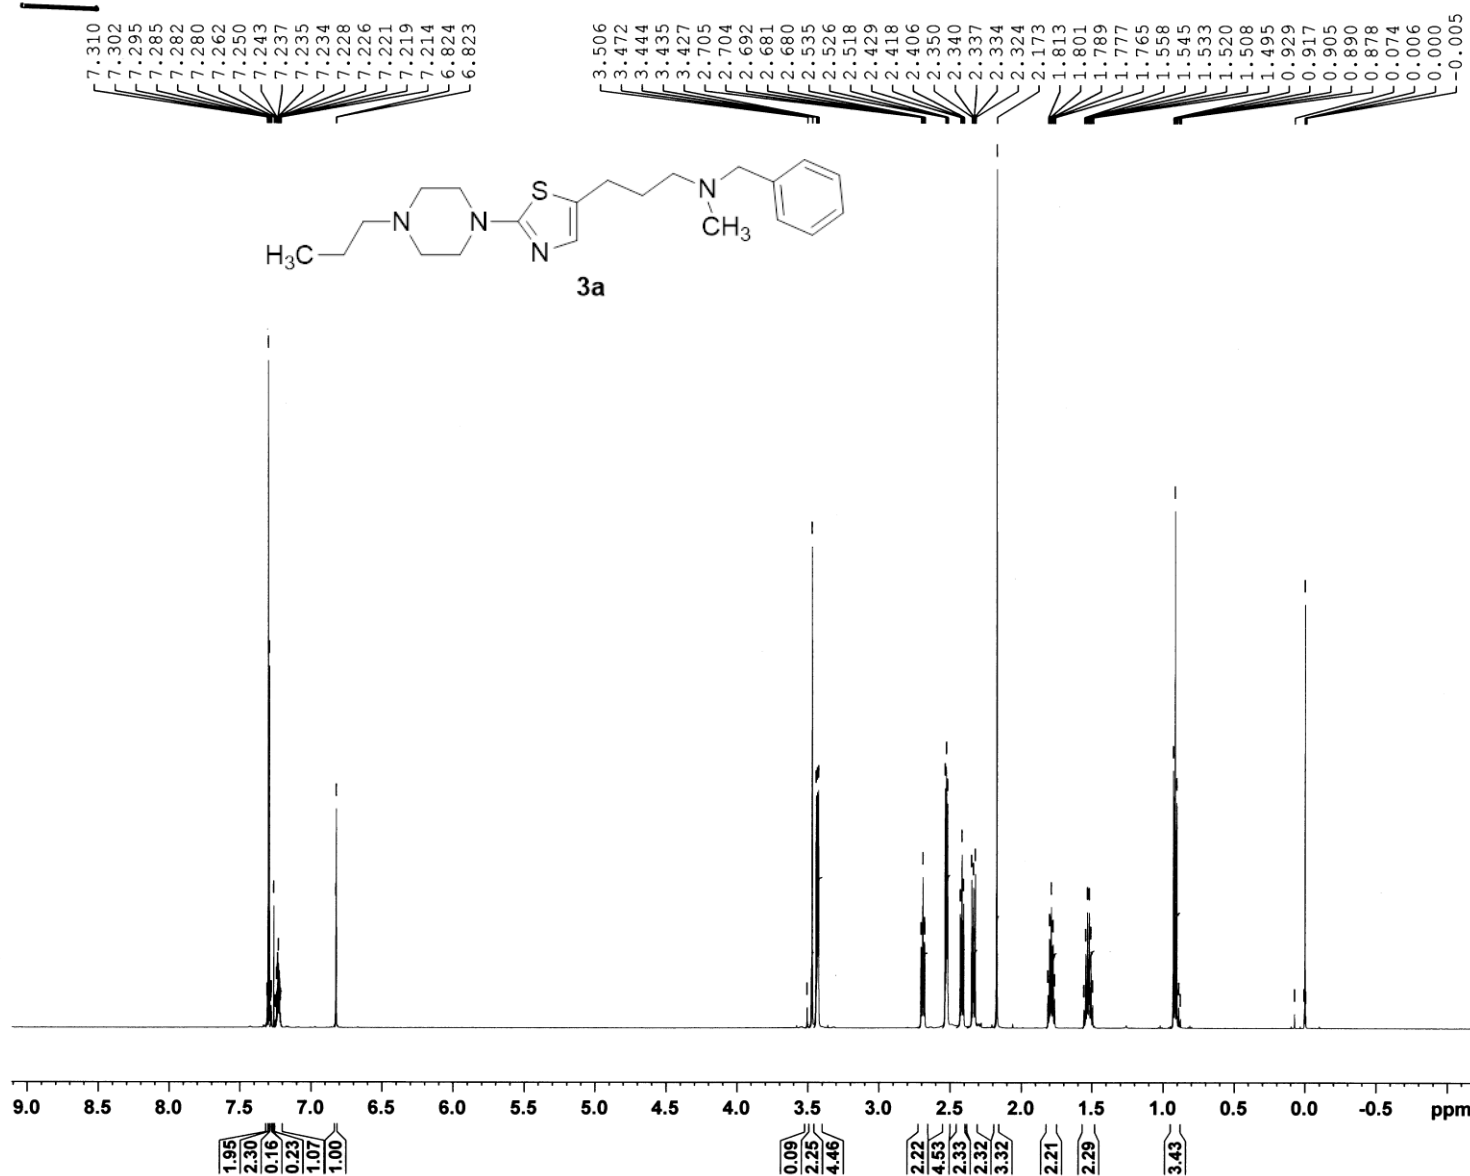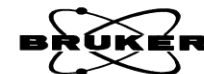

NAME rga 1011  
 EXPNO 11  
 PROCNO 1  
 Date 20110410  
 Time 0.05  
 INSTRUM spect  
 PROBHD 5 mm PABBO BB-  
 PULPROG zg30  
 TD 65536  
 SOLVENT CDCl3  
 NS 16  
 DS 2  
 SWH 12335.526 Hz  
 FIDRES 0.188225 Hz  
 AQ 2.6564426 sec  
 RG 50.8  
 DW 40.533 usec  
 DE 8.50 usec  
 TE 303.1 K  
 D1 1.00000000 sec  
 TD0 1

===== CHANNEL f1 =====  
 NUC1 1H  
 P1 9.40 usec  
 PL1 -3.00 dB  
 PL1W 30.57242203 W  
 SFO1 600.2637069 MHz  
 SI 32768  
 SF 600.2600167 MHz  
 WDW no  
 SSB 0  
 LB 0.00 Hz  
 GB 0  
 PC 1.00

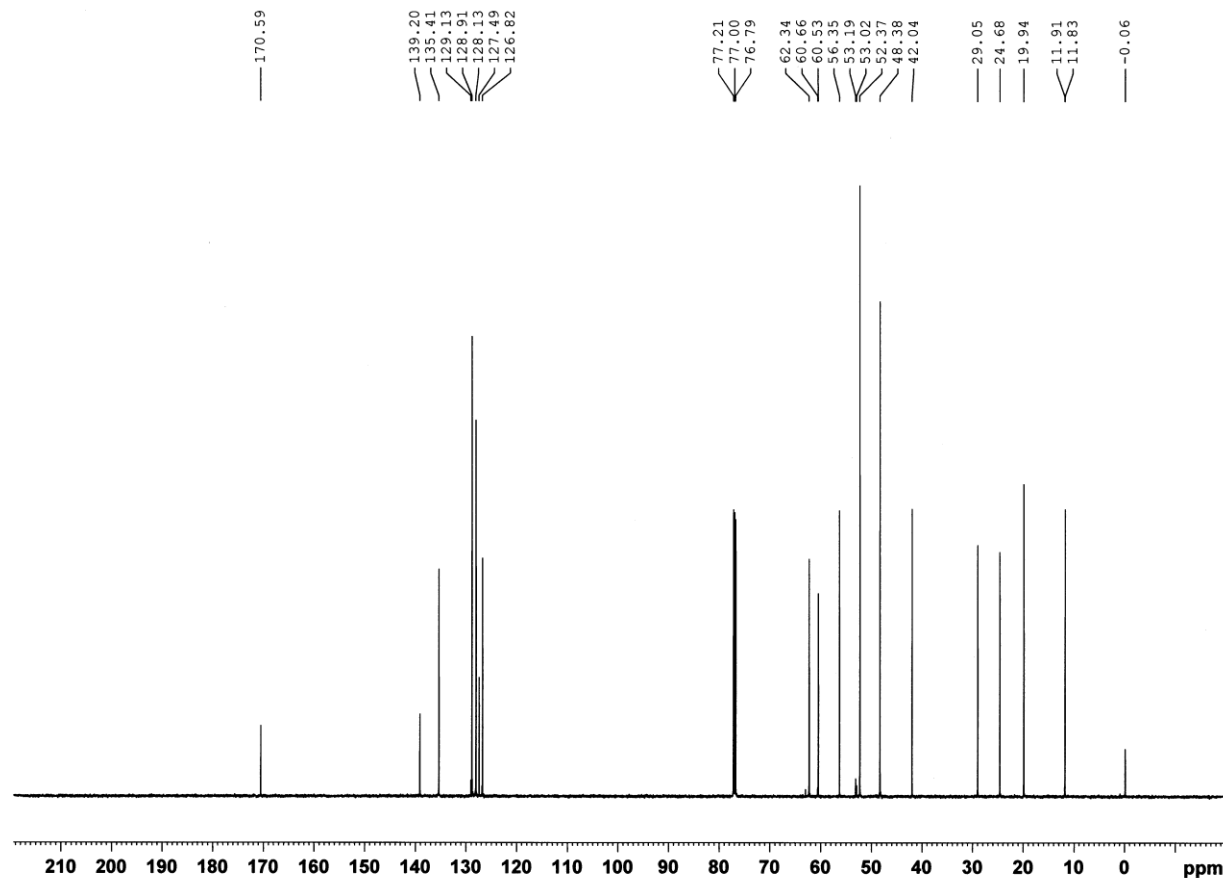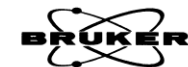

```

NAME      rga 1011
EXPNO     10
PROCNO     1
Date_      20110410
Time       0.04
INSTRUM    spect
PROBHD     5 mm FAPBO BB-
PULPROG    zgpg30
TD         65536
SOLVENT    CDCl3
NS         512
DS         4
SWH         36057.691 Hz
FIDRES     0.550197 Hz
AQ         0.9088159 sec
RG         2050
DW         13.867 usec
DE         8.50 usec
TE         303.7 K
D1         2.00000000 sec
D11        0.03000000 sec
TD0        1

```

```

===== CHANNEL f1 =====
NUC1       13C
P1         10.50 usec
PL1        0.00 dB
PL1W       91.93504333 W
SFO1       150.9505906 MHz

```

```

===== CHANNEL f2 =====
CPDPRG2    waltz16
NUC2       1H
PCPD2      90.00 usec
PL2        -3.00 dB
PL12       16.26 dB
PL13       18.00 dB
PL2W       30.57242203 W
PL12W      0.36251819 W
PL13W      0.24284537 W
SFO2       600.2624010 MHz
SI         32768
SF         150.9355061 MHz
WDW        EM
SSB        0
LB         1.00 Hz
GB         0
PC         1.40

```

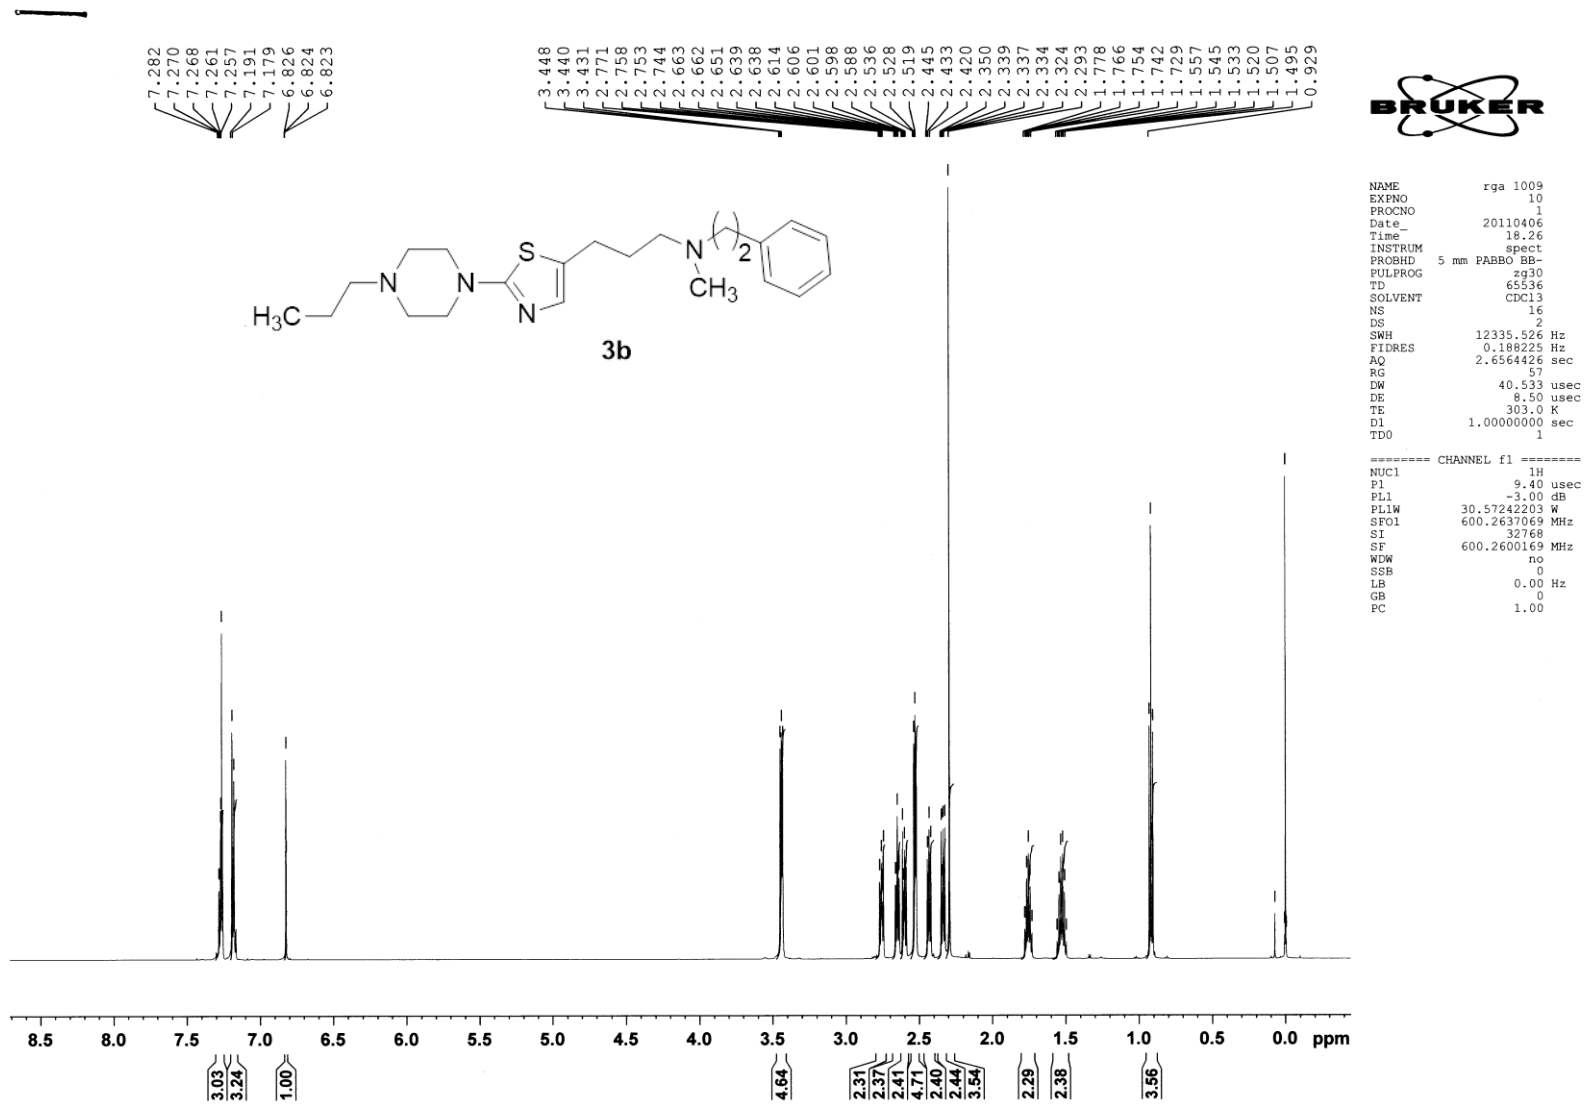

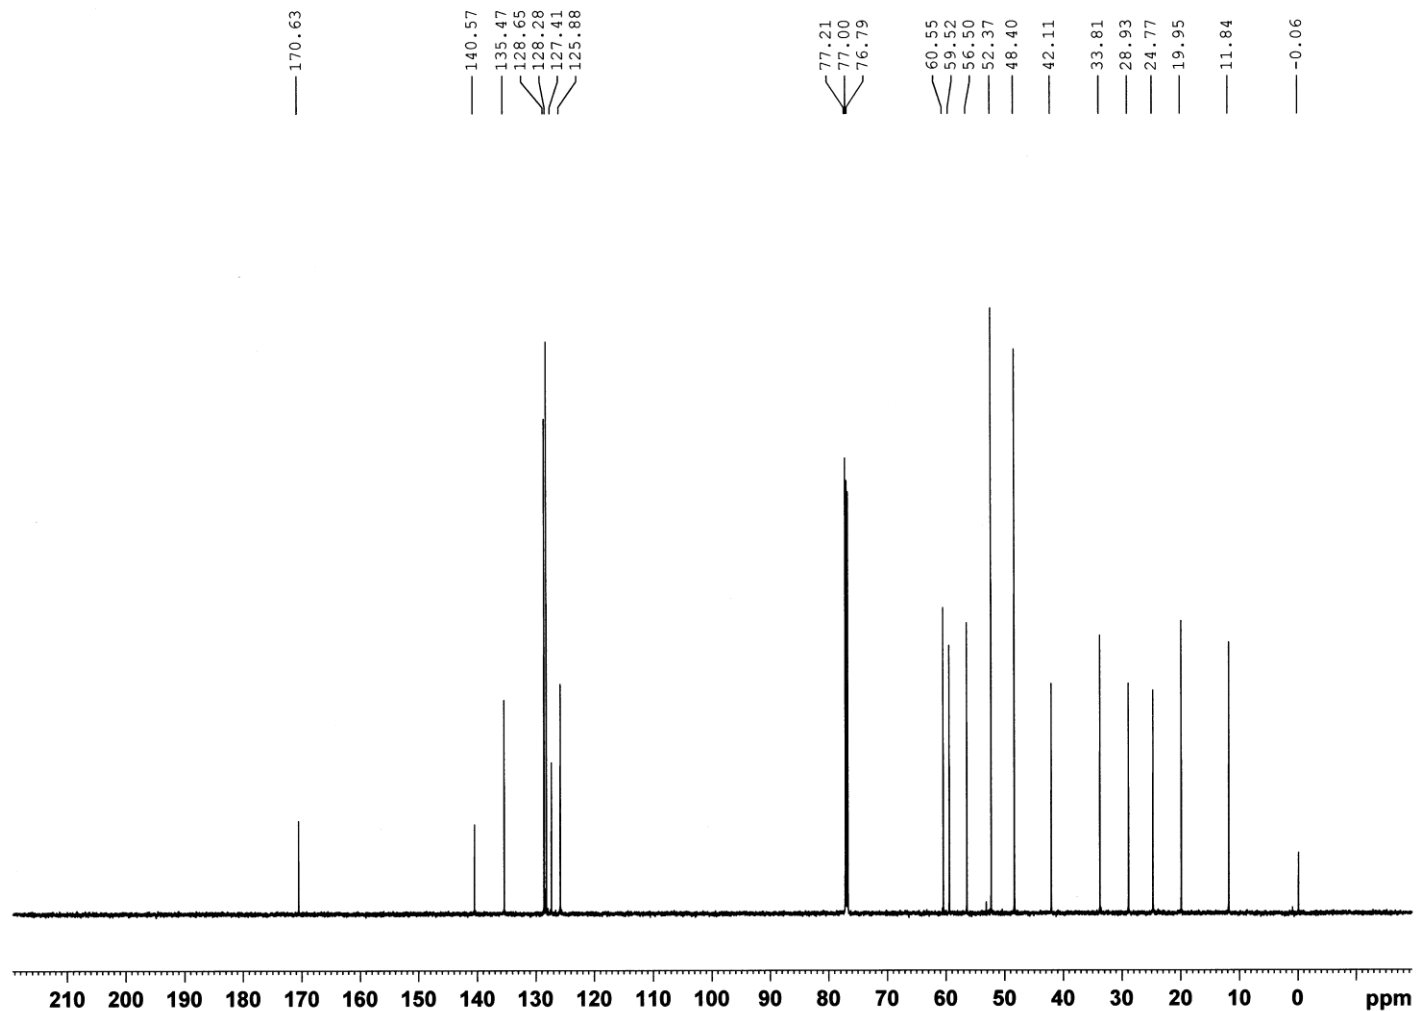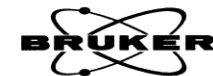

```

NAME      rga 1009
EXPNO     11
PROCNO    1
Date_     20110406
Time      18.52
INSTRUM   spect
PROBHD    5 mm PABBO BB-
PULPROG   zgpg30
TD        65536
SOLVENT   CDCl3
NS         526
DS         4
SWH        36057.691 Hz
FIDRES     0.550197 Hz
AQ         0.9088159 sec
RG         2050
DW         13.867 usec
DE         8.50 usec
TE         304.2 K
D1         2.00000000 sec
D11        0.03000000 sec
TD0        1

===== CHANNEL f1 =====
NUC1       13C
P1         10.50 usec
PL1        0.00 dB
PL1W       91.93504333 W
SFO1       150.9505906 MHz

===== CHANNEL f2 =====
CPDPRG2    waltz16
NUC2       1H
PCPD2      90.00 usec
PL2        -3.00 dB
PL12       16.26 dB
PL13       18.00 dB
PL2W       30.57242203 W
PL12W      0.36251819 W
PL13W      0.24284537 W
SFO2       600.2624010 MHz
SI         32768
SF         150.9355038 MHz
WDW        EM
SSB        0
LB         1.00 Hz
GB         0
PC         1.40

```

SpinWorks 3: no title

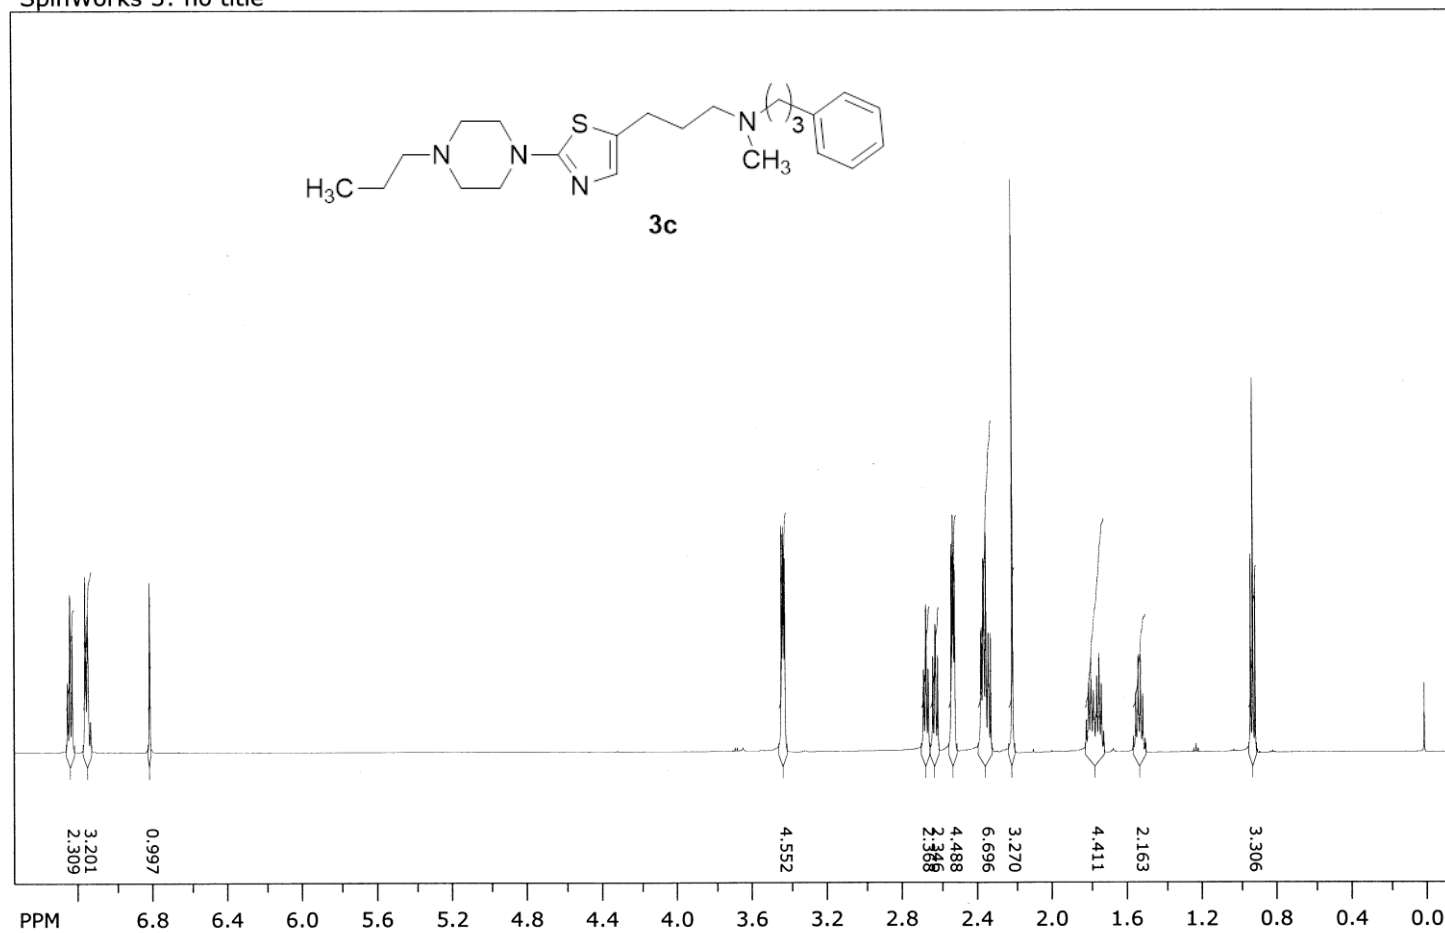

file: ...mr\Analizy bieżące\rga-1276\10\fid expt: <zg30>  
 transmitter freq.: 600.263707 MHz  
 time domain size: 65536 points  
 width: 12335.53 Hz = 20.5502 ppm = 0.188225 Hz/pt  
 number of scans: 16

freq. of 0 ppm: 600.260018 MHz  
 processed size: 32768 complex points  
 LB: 0.000 GF: 0.0000  
 Hz/cm: 184.934 ppm/cm: 0.30809

# SpinWorks 3: no title

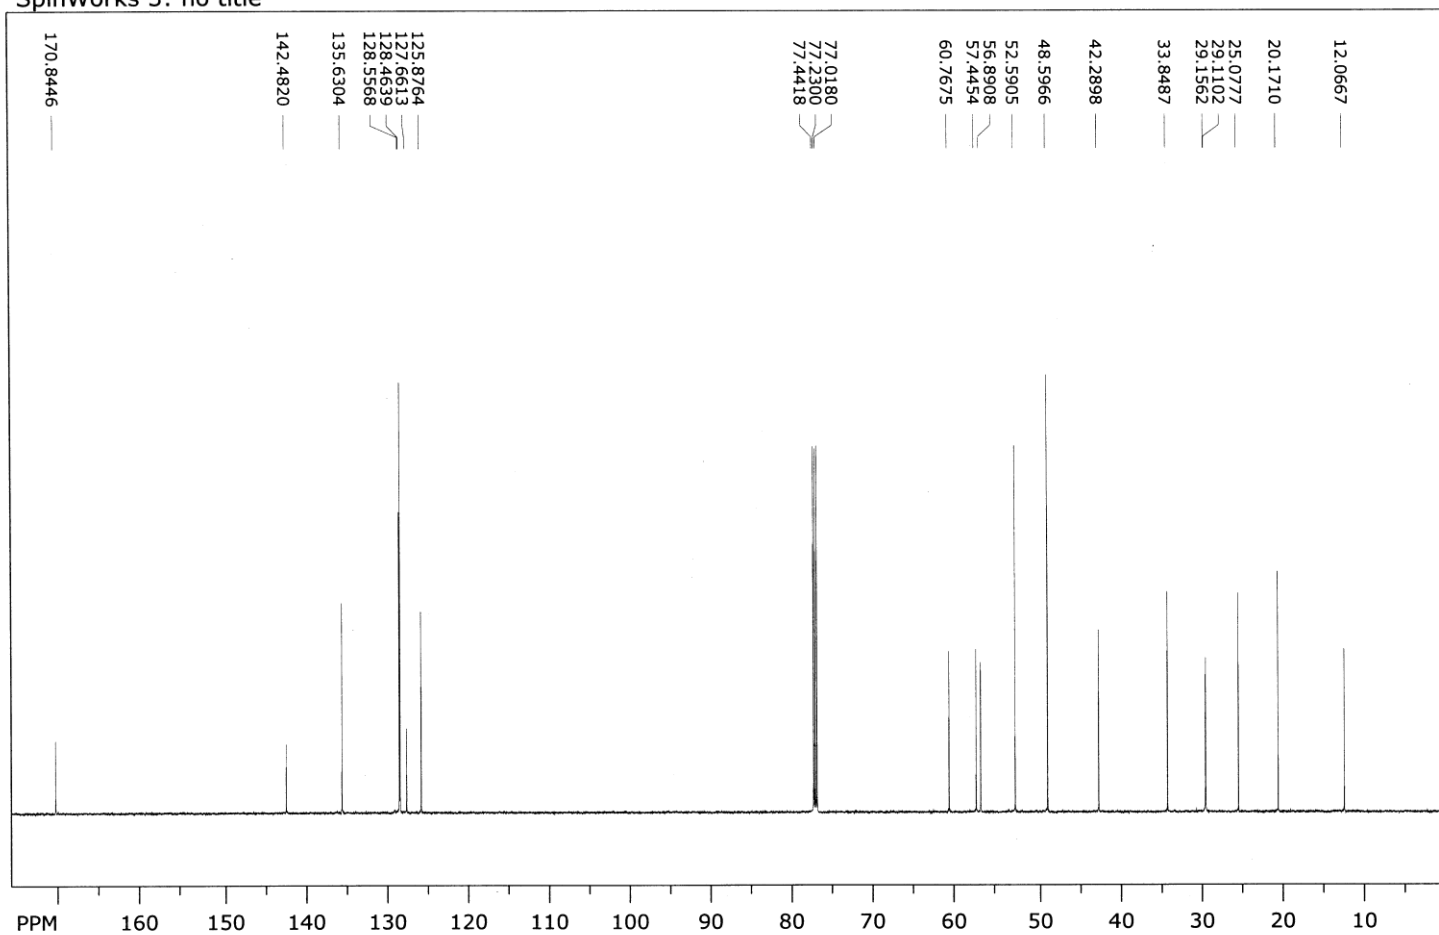

file: ...mr\Analiza bieżąca\rga-1276\11\fid exp: <zpgg30>  
 transmitter freq.: 150.950591 MHz  
 time domain size: 65536 points  
 width: 36057.69 Hz = 238.8708 ppm = 0.550197 Hz/pt  
 number of scans: 1024

freq. of 0 ppm: 150.935471 MHz  
 processed size: 32768 complex points  
 LB: 0.000 GF: 0.0000  
 Hz/cm: 1070.734 ppm/cm: 7.09327

SpinWorks 3: RGA1165 H in CDCl<sub>3</sub>

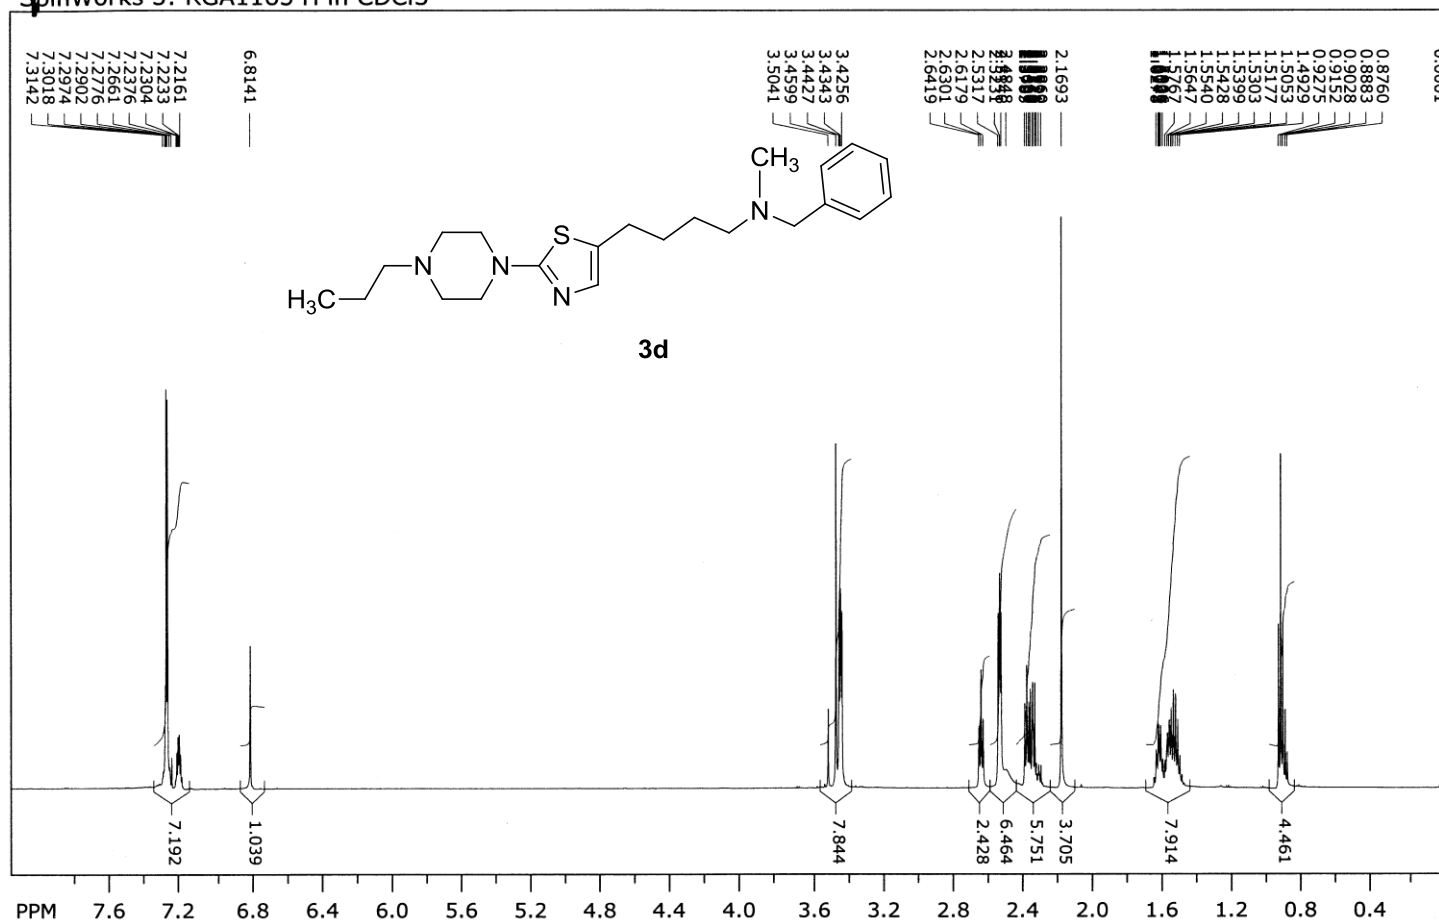

file: K:\rga-1165\11\fid expt: <zg30>  
 transmitter freq.: 600.263707 MHz  
 time domain size: 65536 points  
 width: 12335.53 Hz = 20.5502 ppm = 0.188225 Hz/pt  
 number of scans: 16

freq. of 0 ppm: 600.260014 MHz  
 processed size: 32768 complex points  
 LB: 0.300 GF: 0.0000  
 Hz/cm: 198.164 ppm/cm: 0.33013

SpinWorks 3: RGA 1165 C in CDCl<sub>3</sub>

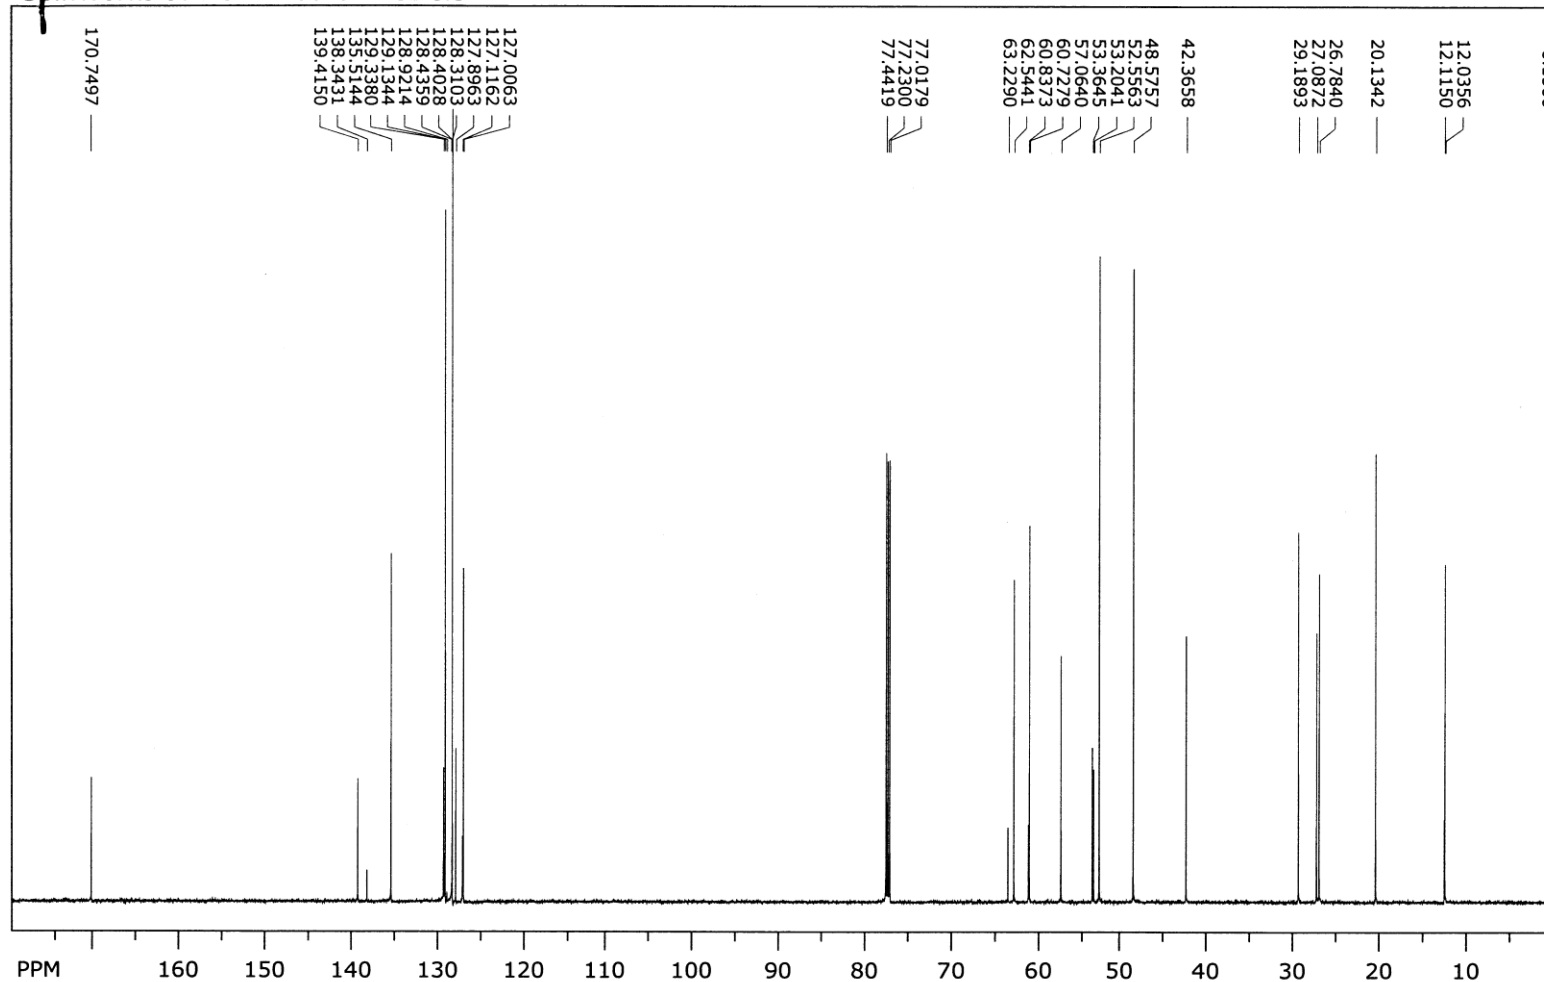

file: K:\rga-1165\10\fid expt: <zpgg30>

transmitter freq.: 150.950591 MHz

time domain size: 65536 points

width: 36057.69 Hz = 238.8708 ppm = 0.550197 Hz/pt

number of scans: 1024

freq. of 0 ppm: 150.935474 MHz

processed size: 32768 complex points

LB: 1.000 GF: 0.0000

Hz/cm: 1091.036 ppm/cm: 7.22777

```

rga1075H
expl std1h

SAMPLE
date Nov 19 2012 dfrq 300.062
solvent CDC13 dn H1
file exp dpwr 40
ACQUISITION dof 0
sfrq 300.063 dm nnn
tn H1 dmm w
at 4.002 dmF 9600
np 52032
sw 6500.0 wtfile
fb 3600 proc ft
bs 4 fn not used
tpwr 58
pw 4.0 werr
d1 1.000 wexp wft
tof 1400.0 wbs wft
nt 16 wnt
ct 16
alock n
gain not used

FLAGS
il n
in n
dp y

DISPLAY
sp -14.1
wp 2474.3
vs 243
sc 0
wc 270
hzmm 9.16
is 315.01
rfl 415.6
rfp 0
th 1
ins 100.000
nm cdc ph

```

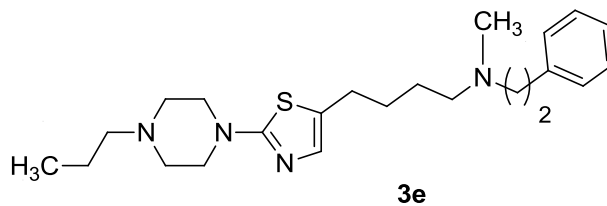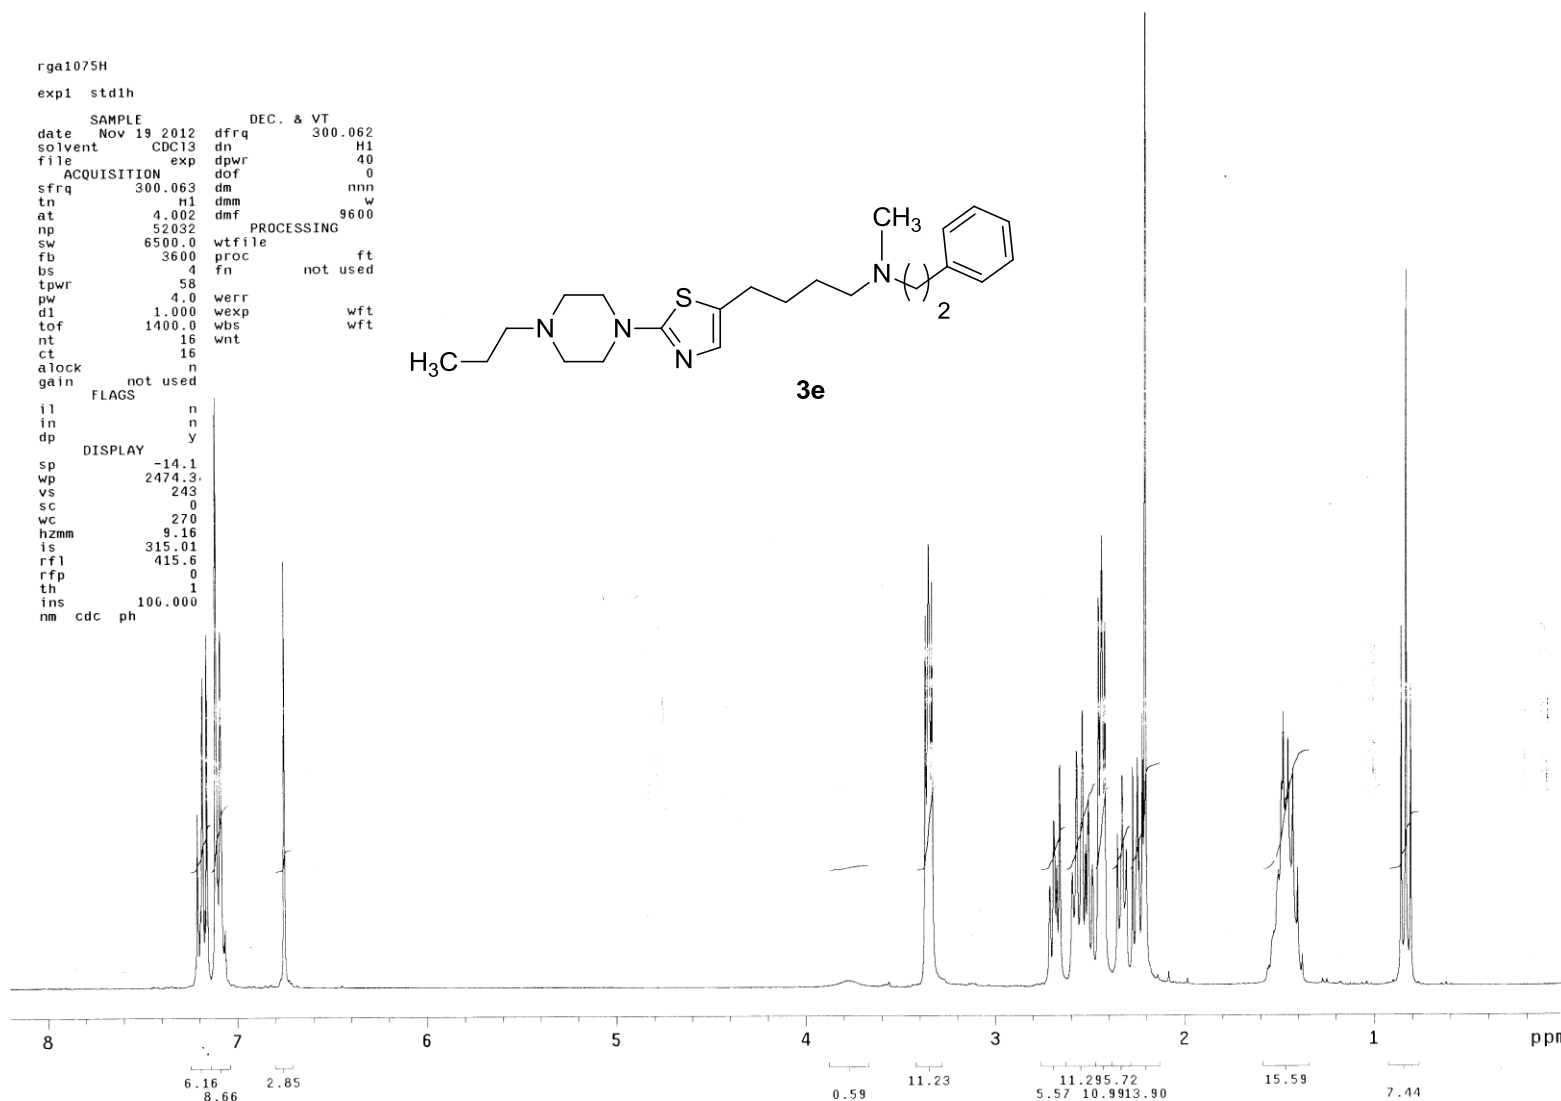

rga1075C

exp3 std13c

```

SAMPLE          DEC. & VT
date    Nov 19 2012    dfrq    300.062
solvent  CDC13        dn      H1
file     exp          dpwr    40
ACQUISITION      dof      0
sfrq      75.458      dm      YYY
tn         C13        dmm      w
at         1.815      dmf     9600
np        68096      PROCESSING
sw        18761.7      lb      1.00
fb        10400      wtfile
bs         16        proc      ft
tpwr       58        fn      not used
pw         6.3
d1         1.000      werr
tof         0        wexp      wft
nt        1024      wbs      wft
ct         368      wnt
alock      n
gain      not used
          FLAGS
il         n
in         n
dp         y
          DISPLAY
sp         27.4
wp        13627.2
vs         192
sc         0
wc         270
hzmm       50.47
is         500.00
rfl        7676.7
rfp        5827.0
th         7
ins        100.000
nmr no ph
```

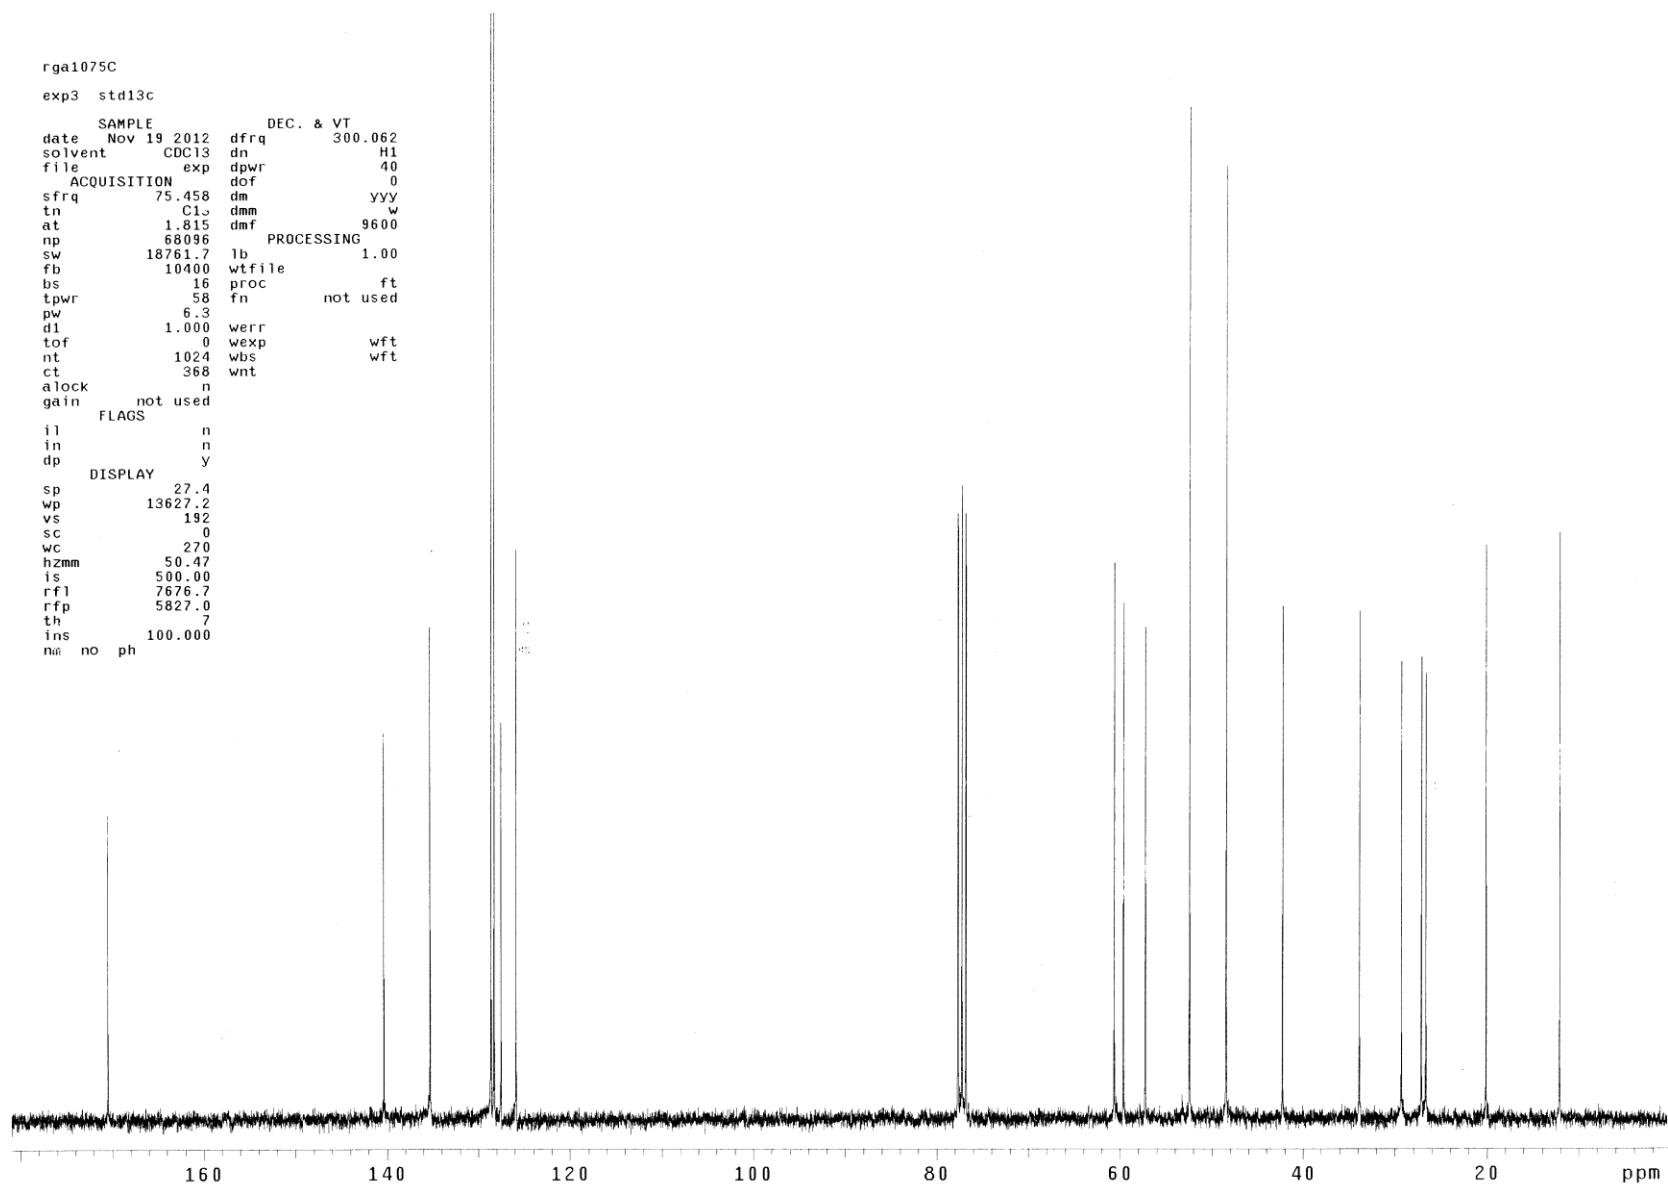

rga1077H  
expl std1h

|             |             |            |          |
|-------------|-------------|------------|----------|
| SAMPLE      |             | DEC. & VT  |          |
| date        | Dec 10 2012 | dfrq       | 300.062  |
| solvent     | CDC13       | dn         | H1       |
| file        | exp         | dpwr       | 40       |
| ACQUISITION |             | dof        | 0        |
| sfrq        | 300.063     | dm         | nnn      |
| tn          | H1          | dmm        | w        |
| at          | 4.002       | dmf        | 9600     |
| np          | 52032       | PROCESSING |          |
| sw          | 6500.0      | wtfile     |          |
| fb          | 3600        | proc       | ft       |
| bs          | 4           | fn         | not used |
| tpwr        | 58          |            |          |
| pw          | 8.0         | werr       |          |
| d1          | 1.000       | wexp       | wft      |
| tof         | 1400.0      | wbs        | wft      |
| nt          | 16          | wnt        |          |
| ct          | 16          |            |          |
| alock       | n           |            |          |
| gain        | not used    |            |          |
| FLAGS       |             |            |          |
| il          | n           |            |          |
| in          | n           |            |          |
| dp          | y           |            |          |
| DISPLAY     |             |            |          |
| sp          | -38.7       |            |          |
| wp          | 2671.7      |            |          |
| vs          | 146         |            |          |
| sc          | 0           |            |          |
| wc          | 270         |            |          |
| hzm         | 9.90        |            |          |
| is          | 355.04      |            |          |
| rfl         | 397.1       |            |          |
| rfp         | 0           |            |          |
| th          | 5           |            |          |
| ins         | 100.000     |            |          |
| ai          | cdc ph      |            |          |

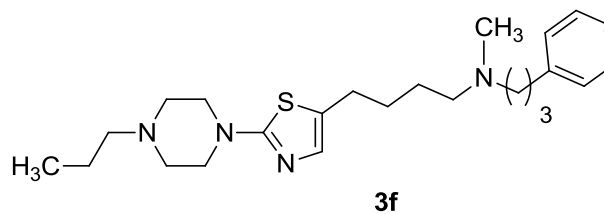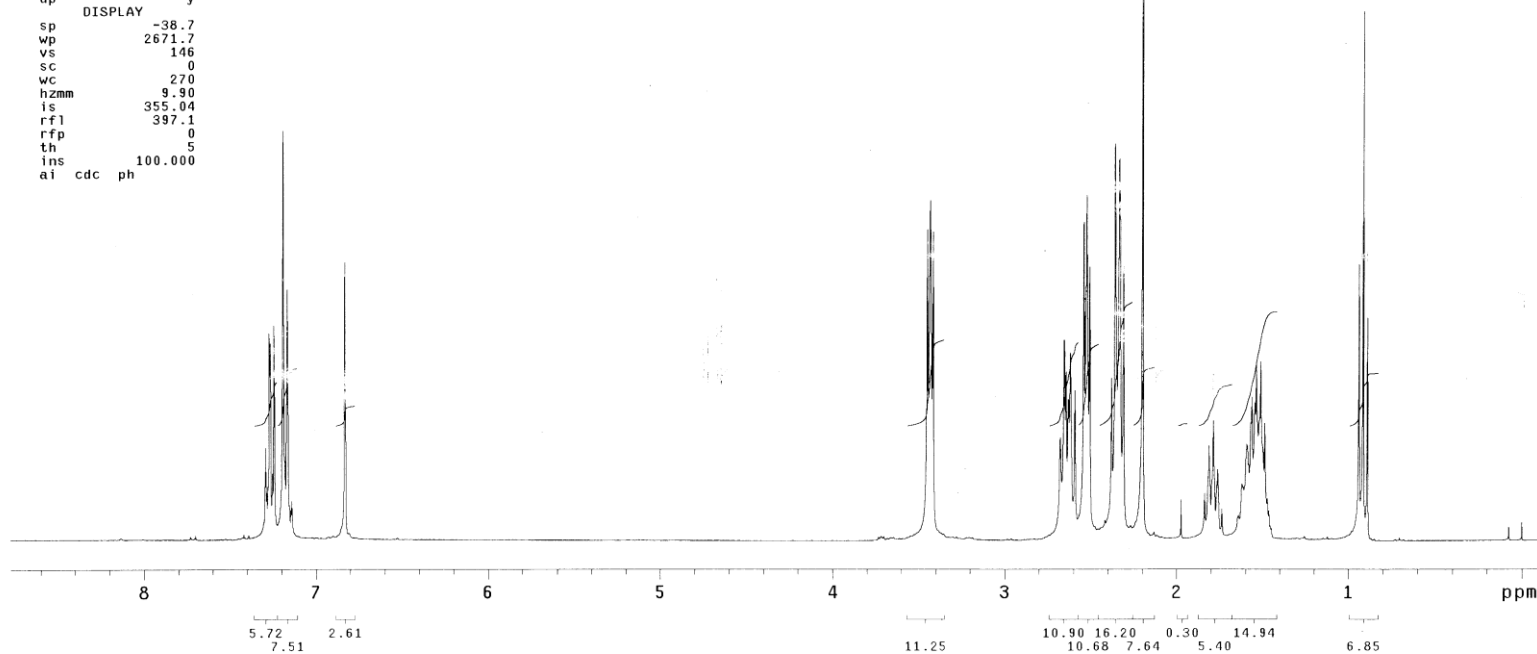

1790 1077C

13C OBSERVE

exp3 std13c

|             |             |            |          |
|-------------|-------------|------------|----------|
| SAMPLE      |             | DEC. & VT  |          |
| date        | Dec 10 2012 | dfrq       | 300.062  |
| solvent     | CDC13       | dn         | H1       |
| file        | exp         | dpwr       | 40       |
| ACQUISITION |             | dof        | 0        |
| sfrq        | 75.458      | dm         | yyy      |
| tn          | C13         | dmm        | w        |
| at          | 1.815       | dmf        | 9600     |
| np          | 68096       | PROCESSING |          |
| sw          | 18761.7     | lb         | 1.00     |
| fb          | 10400       | wtfile     |          |
| bs          | 16          | proc       | ft       |
| tpwr        | 58          | fn         | not used |
| pw          | 6.3         |            |          |
| d1          | 1.000       | werr       |          |
| tof         | 0           | wexp       | wft      |
| nt          | 1024        | wbs        | wft      |
| ct          | 320         | wnt        |          |
| alock       | n           |            |          |
| gain        | not used    |            |          |
| FLAGS       |             |            |          |
| il          | n           |            |          |
| in          | n           |            |          |
| dp          | y           |            |          |
| DISPLAY     |             |            |          |
| sp          | -137.7      |            |          |
| wp          | 14692.7     |            |          |
| vs          | 162         |            |          |
| sc          | 0           |            |          |
| wc          | 270         |            |          |
| hzmm        | 54.42       |            |          |
| is          | 500.00      |            |          |
| rfl         | 7669.3      |            |          |
| rfp         | 5827.0      |            |          |
| th          | 7           |            |          |
| ins         | 100.000     |            |          |
| nm          | no          | p:         |          |

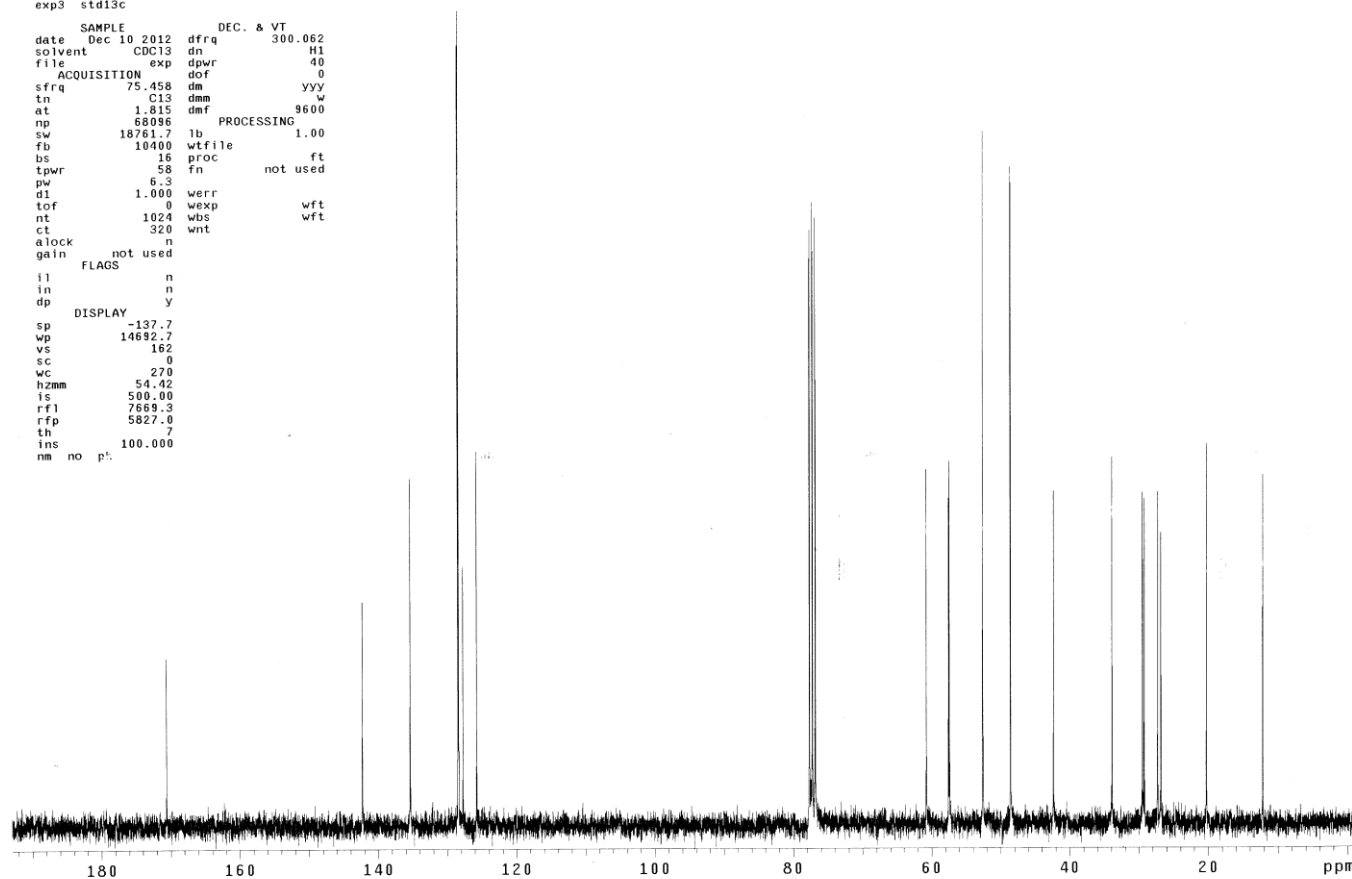

Supplement: s1 [file s1]
