# Supplementary material for: Non-Imidazole Histamine H3 Ligands. Part VII. Synthesis, In Vitro and In Vivo Characterization of 5-Substituted-2-thiazol-4-n-propylpiperazines
Source: MDPI journal article supplement (doi:10.3390/molecules23020326), 2018-02-03
Supplement: s1 [file s1]

## Appendix B

### Supplementary data

#### Pharmacology

##### 2.2.2 Histamine H<sub>3</sub> receptor affinity

##### *Saturation of rat and human H<sub>3</sub> receptors*

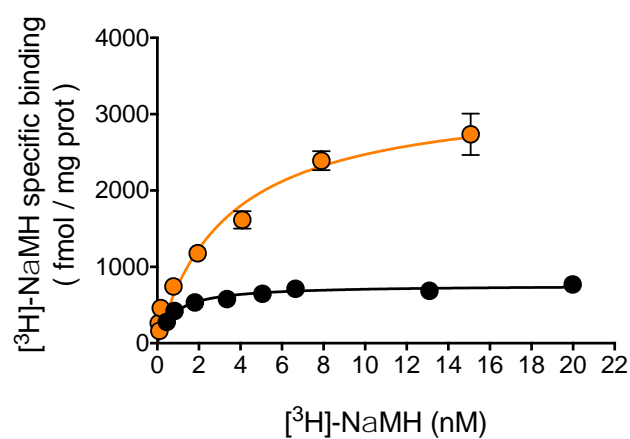

**Figure S1.** Saturation of rat and human H<sub>3</sub>R.

##### *Competition binding of H<sub>3</sub> receptor ligands*

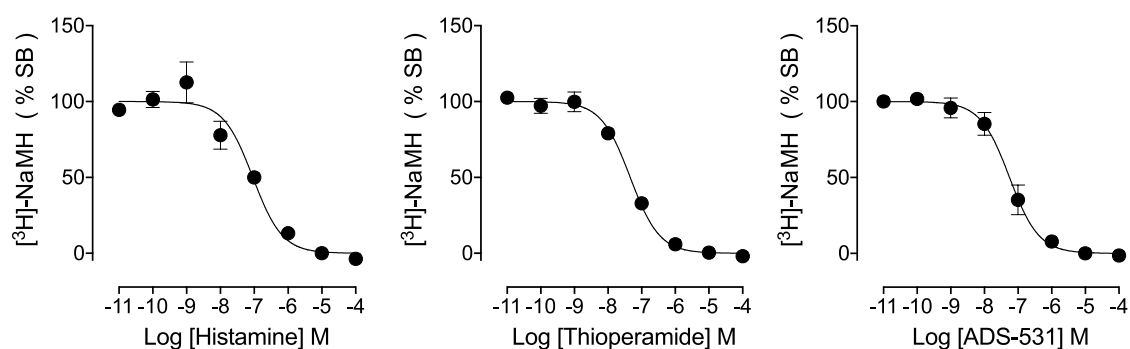

**Figure S2.** Competition binding of H<sub>3</sub>R ligands on rat H<sub>3</sub> receptor.

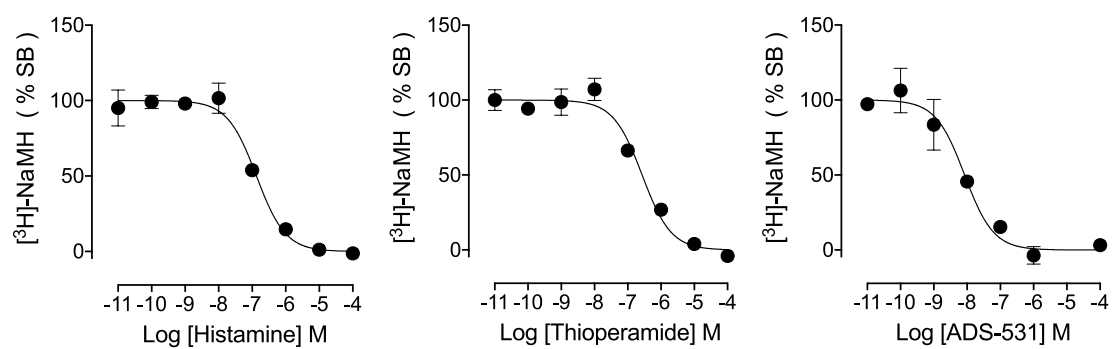

**Figure S3:** Competition binding of H<sub>3</sub>R ligands on human H<sub>3</sub> receptor
